# Supplementary material for: Corrosion behaviour of equiatomic CoFeNi medium entropy alloy in molten chloride salts
Source: Research Square preprint supplement (doi:10.21203/rs.3.rs-8795583/v1), 2026-02-17
Supplement: Supplementary file 1 [file 11fbf9a777ab4f7f2b4b3336.docx]

**Corrosion behaviour of equiatomic CoFeNi medium entropy alloy in molten chloride salts**

P. Dinesh Babu 1, Arivarasu Moganraj 2*

1 Department of Physics, School of Advanced Sciences, Vellore Institute of Technology, Vellore, Tamil Nadu 632014, India

2 Centre for Innovative Manufacturing Research, Vellore Institute of Technology, Vellore, Tamil Nadu 632014, India

* Corresponding authors

E-mail addresses: arivarasu.m@vit.ac.in (Arivarasu Moganraj)

**Table S1** Properties of pure metals.

| **Element** | **Co** | **Fe** | **Ni** |
| --- | --- | --- | --- |
| Crystal structure at ambient temperature | HCP | BCC | FCC |
| Atomic radius (*r*), pm [S1] | 1.251 | 1.241 | 1.246 |
| Valence electron concentration (*VEC*) [S1] | 9 | 8 | 10 |
| Electronegativity (*χ*), Pauling [S1] | 1.88 | 1.83 | 1.91 |
| Density (*ρ*), g cm-3 [S2] | 8.900 | 7.874 | 8.908 |
| Melting temperature (*Tm*), K [S2] | 1768 | 1811 | 1728 |
| Lattice parameter (Pm) | 250.71 | 286.65 | 352.4 |

**Table S2** Values of *ΔHij* (*i*, *j* = Fe, Co, Ni, and; *i ≠j*) (kJ mol-1) as calculated by Miedema’s model [S5] for atomic pairs of elements Fe, Co and Ni.


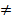


| **Element** | **Co** | **Fe** | **Ni** |
| --- | --- | --- | --- |
| **Co** |  | **-1** | **0** |
| **Fe** |  |  | **-2** |
| **Ni** |  |  |  |

**Table S3** Thermodynamic parameter and properties of CoFeNi

| **Parameter** | CoFeNi |
| --- | --- |
| Enthalpy of mixing (Δ*Hmix*) | -1.333 kJ mol-1 |
| Entropy of mixing *(∆Smix*) | 9.134 J K-1 mol-1 |
|  | 12.168 |
| Atomic radius difference (*δ*) | 1.23% |
| Valence electron concentration (*VEC*) | 8.9 |
| Electronegativity difference (*χ*), Pauling | 0.033 |
| Density average (*ρ*mix) | 8.55 g/cm3 |
| Melting temperature average (*T*m) | 1771.823K |
| Vegard law | 296.584 |





**Figure S1** X-ray diffractogram pattern of individual metal powder (a) Co, (b) Ni, (c) Fe.


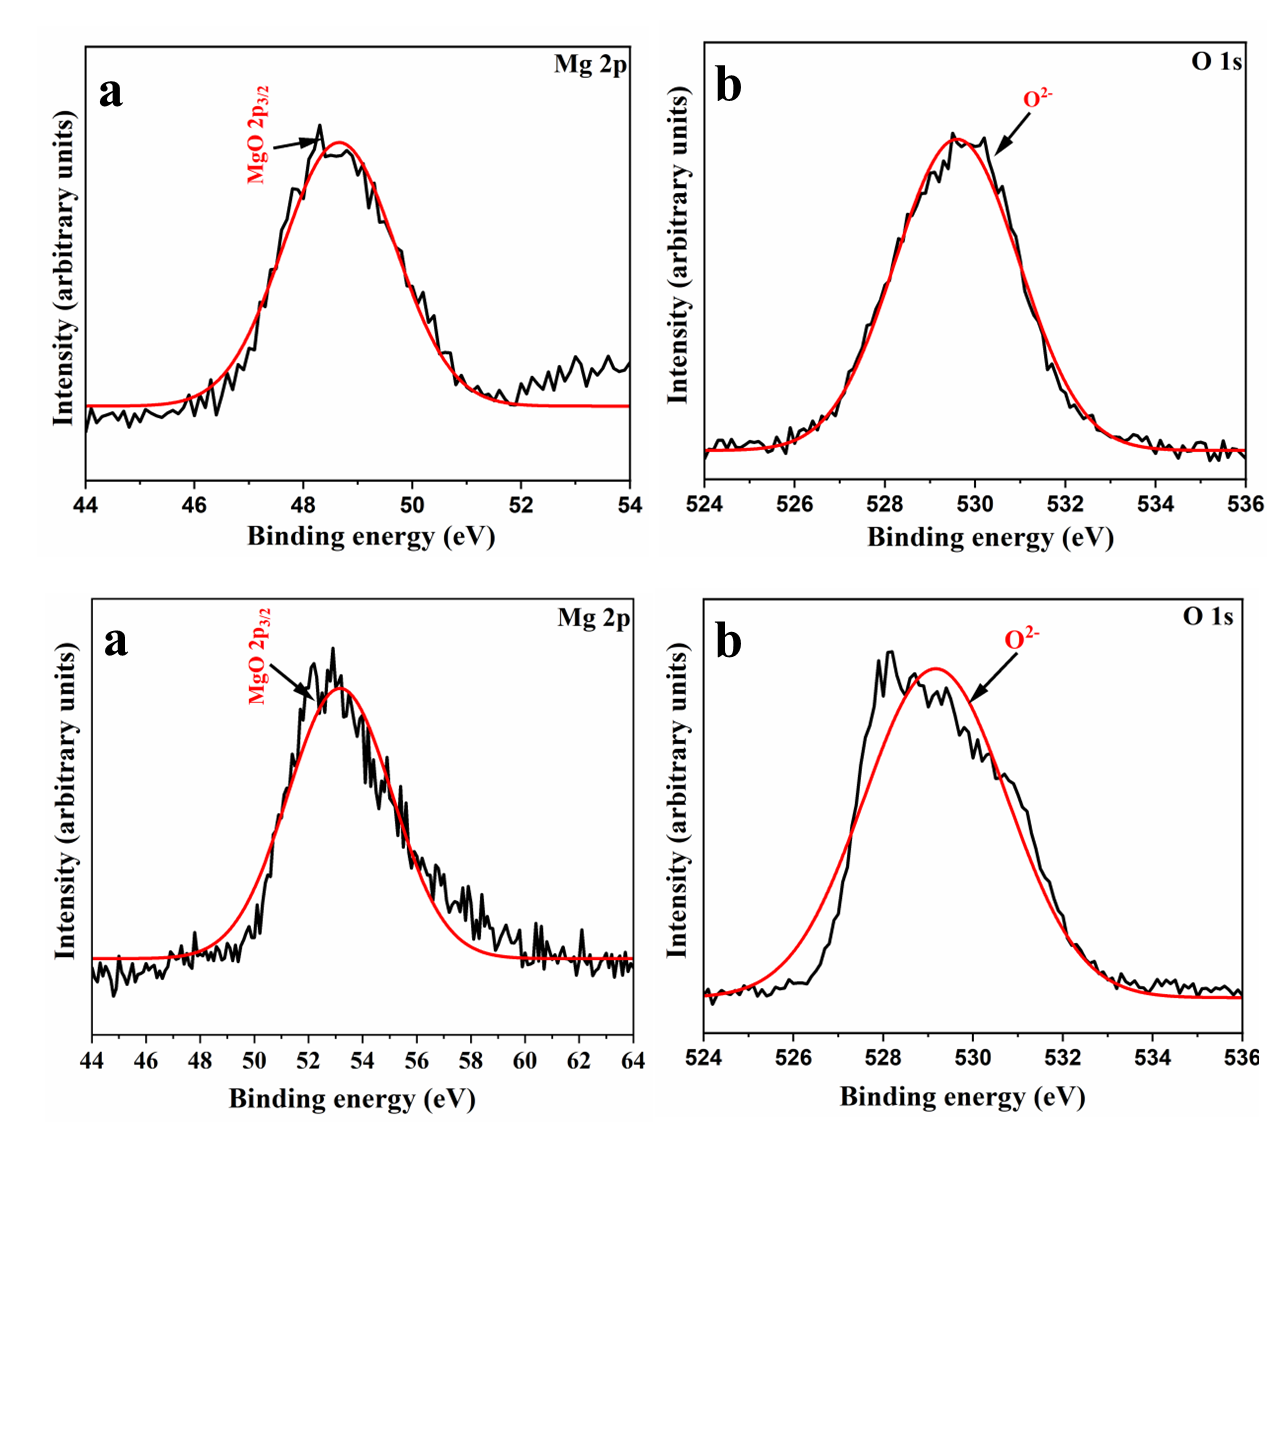


**Figure S2** High-resolution XPS spectra of a) Mg, c) O, on the corroded surface of CoFeNi alloy after 100h of testing at 600℃.


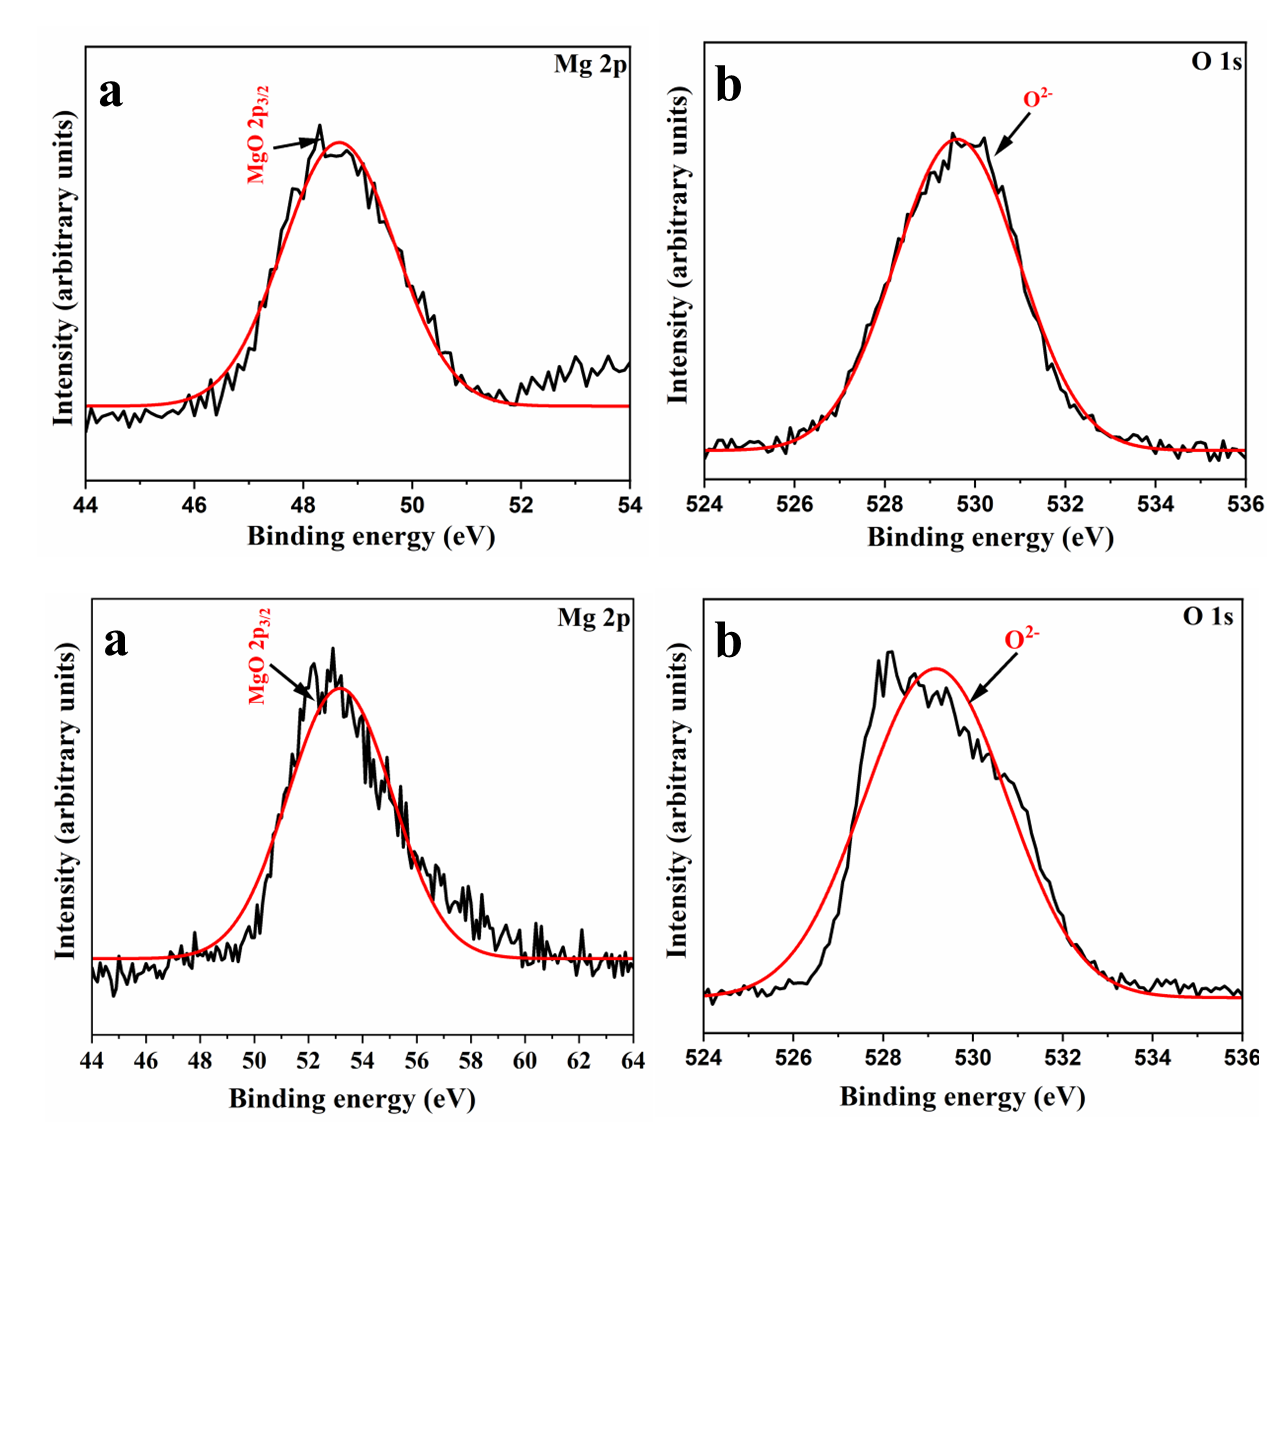

**Figure S3** High-resolution XPS spectra of a) Mg, c) O, on the corroded surface of AISI 321 SS after 100h of testing at 600℃.


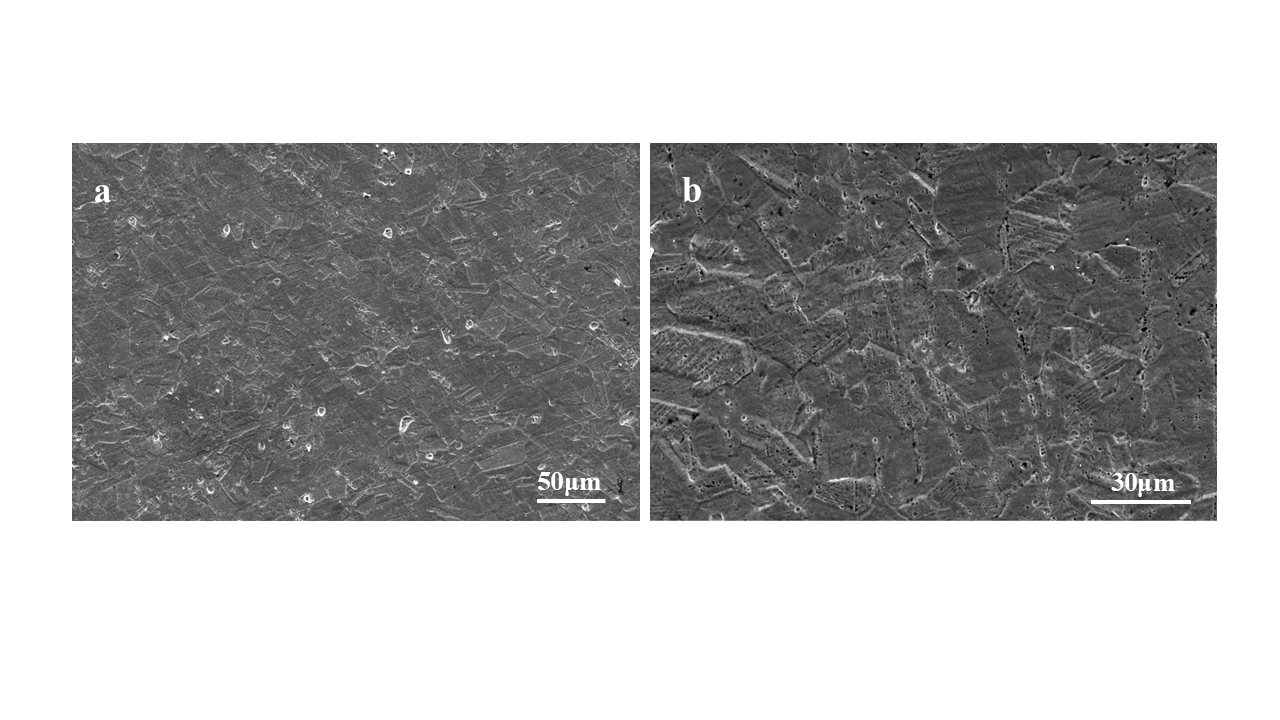


**Figure S4** FE-SEM images of the etched surface of AISI 321 SS at a) low magnification and b) high magnification

**
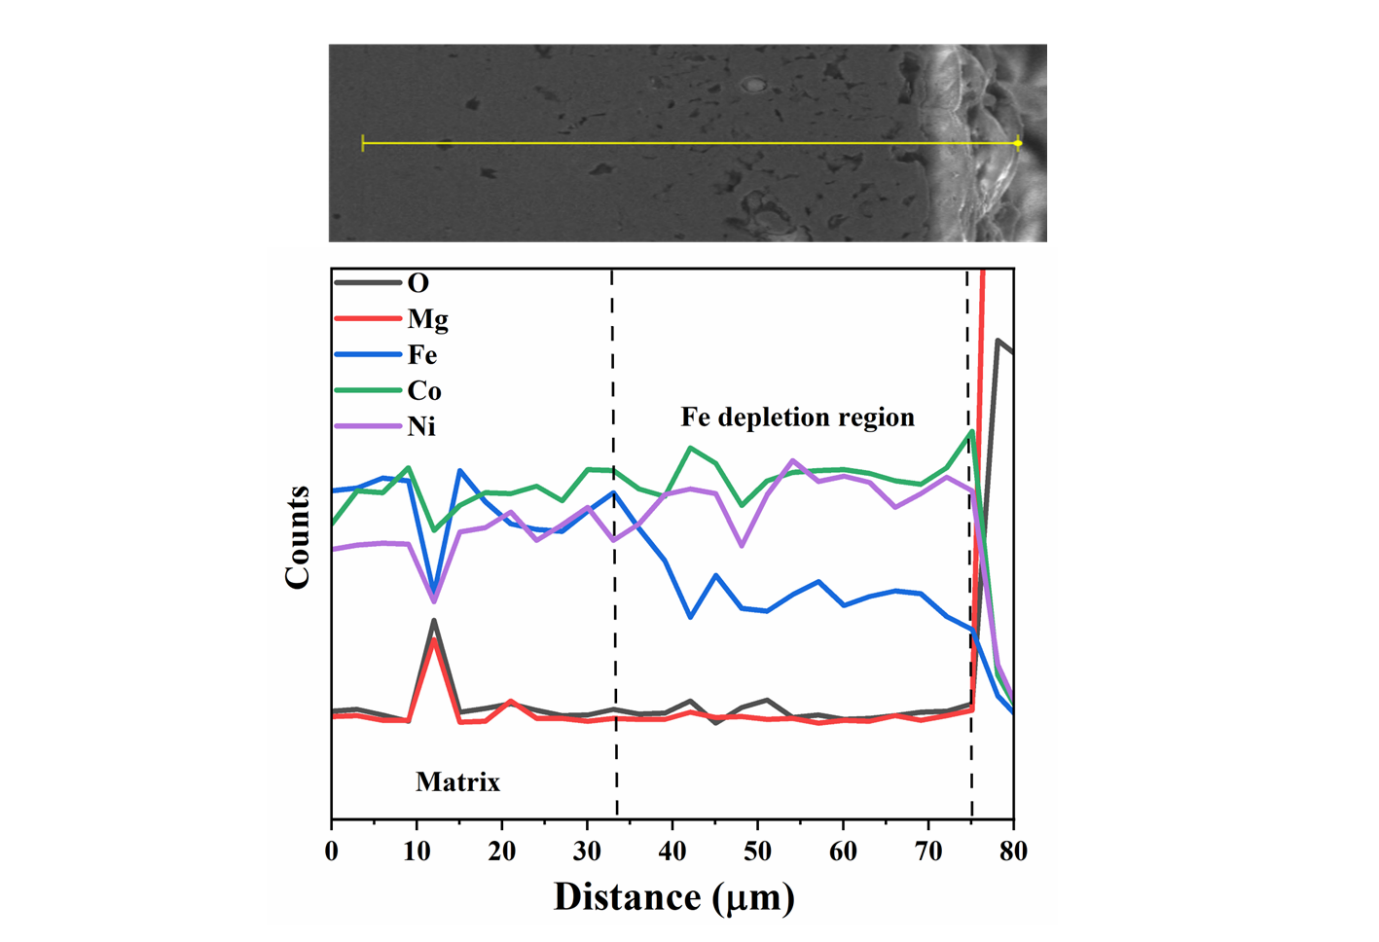
**

**Figure S5** Cross-section line profiles of CoFeNi alloy after 100h corrosion in molten chloride salt at 600℃, with corresponding line maps

**Reference**

[S1] S. Guo, C.T. Liu, Prog. Nat. Sci.: Mater. Int. 21 (2011) 433-446.

[S2] <https://www.webelements.com/>. (Accessed on 7/07/2023)

[S3] A. Takeuchi, A. Inoue, Classification of bulk metallic glasses by atomic size difference, heat of mixing and period of constituent elements and its application to characterization of the main alloying element, Mater. Trans. 46 (2005) 2817-2829.
